# Supplementary material for: Layer-by-layer coating and chemical cross-linking of multilayer polysaccharides on silica for mixed-mode HPLC application
Source: Royal Society of Chemistry journal article supplement (doi:10.1039/d1cc04467b), 2021-01-01
Supplement: d1cc04467b1.pdf [file d1cc04467b1.pdf]

**Electronic Supplementary Information for**

**Layer-by-layer Coating and Chemical Cross-linking of**

**Multilayer Polysaccharides on Silica for Mixed-mode HPLC**

**Application**

Zhanying Chu<sup>a</sup>, Manman Zhu<sup>a</sup>, Weibing Zhang<sup>b</sup>, Yang Zhao<sup>a</sup>, Xiaoyun Gong<sup>a</sup>, You  
Jiang<sup>a</sup>, Liqing Wu<sup>a</sup>, Rui Zhai<sup>a\*</sup>, Xinhua Dai<sup>a\*</sup>, Xiang Fang<sup>a\*</sup>

a. Technology Innovation Center of Mass Spectrometry for State Market Regulation,  
Center for Advanced Measurement Science, National Institute of Metrology, Beijing  
100029, PR China

b. Shanghai Key Laboratory of Functional Materials Chemistry, School of Chemistry  
& Molecular Engineering, East China University of Science and Technology,  
Shanghai, 200237, PR China

\*Corresponding Authors:

Rui Zhai

Center for Advanced Measurement Science

National Institute of Metrology

Beijing 100029, China

Email: zhairui@nim.ac.cn

Phone: +86-010-64526389

Xinhua Dai

Technology Innovation Center of Mass Spectrometry for State Market Regulation

National Institute of Metrology

Beijing 100029, China

Email: daixh@nim.ac.cn

Phone: +86-010-64524962

Xiang Fang

Technology Innovation Center of Mass Spectrometry for State Market Regulation

National Institute of Metrology

Beijing 100029, China

Email: fangxiang@nim.ac.cn

Phone: +86-010-64524218

## Experimental Section

### Reagents and Material

Spherical silica (5  $\mu\text{m}$ , 120  $\text{\AA}$ , 280  $\text{m}^2/\text{g}$ ) was purchased from DASIO Co., Ltd. (Osaka, Japan). Toluene (GR grade), NaCl (AR grade), acetic acid (HAc, GR grade), and  $\text{NaHCO}_3$  (AR grade) were purchased from LingFeng Chemical Reagents Co., Ltd. (Shanghai, China). 3-Aminopropyltriethoxysilane (APTES, 98%) was purchased from Aladdin (Shanghai, China). Sodium hyaluronate (HA, Mw = 100 KDa) was purchased from Zhenjiang Dong Yuan Biotech Co., Ltd., (Zhenjiang, China). Chitosan (CS, low molecular weight), 1-(3-dimethylaminopropyl)-3-ethylcarbodiimide hydrochloride ( $\text{EDC}\cdot\text{HCl}$ , 98%), and N-hydroxysuccinimide (NHS, 90%) were purchased from Sigma-Aldrich (St. Louis, MO, USA). Methyl alcohol (MeOH, AR grade) and ethyl alcohol (EtOH, AR grade) used in the synthesis procedure were purchased from Titan Scientific Co., Ltd. (Shanghai, China). MeOH (HPLC grade) and acetonitrile (ACN, HPLC grade) were purchased from ANPEL Laboratory Technologies (Shanghai, China). Click XIon column (5  $\mu\text{m}$ , 100  $\text{\AA}$ , 150 mm  $\times$  4.6 mm) was obtained from Acchrom Technologies Co., Ltd. (Beijing, China). Ultrapure water (18.2  $\text{M}\Omega\cdot\text{cm}$ ) was obtained from a Sartorius Ultrapure Water System (Gottingen, Germany) and was used throughout the experiments.

### Synthesis Procedure

The synthesis procedure is represented in scheme 1. First, 5 g of spherical silica was dispersed in a 50 mL water/ethanol (3:7, v/v) solution, and then 6 g of APTES was added to the suspension. After mixing, the mixture was refluxed at 110  $^\circ\text{C}$  for 24 h. The white solid product (named  $\text{SiO}_2@(\text{NH}_2)$ ) was collected by filtration, washed with methanol and water successively and dried in an oven at 55  $^\circ\text{C}$ . Next, the  $\text{SiO}_2@(\text{HA-CS})_{12}$  stationary phase was synthesized via a step-by-step assembly strategy.  $\text{SiO}_2@(\text{NH}_2)$  was dispersed into 60 mL of HA solution (5 mg/mL dissolved in 0.135 mol/L NaCl aqueous solution containing 2% HAc). The mixture was softly shaken for 30 min, and then the particles were centrifugally separated and washed several times

with water. Subsequently, the obtained product was dispersed into 60 mL of CS solution (5 mg/mL dissolved in 0.135 mol/L NaCl aqueous solution containing 2% HAc), and the mixture was treated in the same way as described above. After repeating for 6 cycles, the particles were washed thoroughly with water. Next, the cross-linking reaction of CS and HA, which had been assembled on the silica surface through electrostatic adsorption, was performed. The obtained product was dispersed into 150 mL of  $\text{NH}_3\text{HCO}_3$  aqueous solution (10 mmol/L) that contained EDC·HCl (2 mg/mL) and NHS (2 mg/mL), and the reaction lasted overnight with gentle magnetic stirring. The product was successively washed with water and ethyl alcohol three times. Finally, the product (named  $\text{SiO}_2@(\text{CS-HA})_{12}$ ) was dried in an oven at 50 °C. For the sake of description, the obtained products during the assembly procedure were named  $\text{SiO}_2@(\text{HA-CS})_n$ , where 'n' is the layer number of polysaccharides assembled on the silica surface.

### **Characterization**

Scanning electron microscopy (SEM) images were obtained from a JSM-6360 LV Tungsten filament scanning electron microscope (JEOL Co., Ltd., Japan). Elemental analysis (EL) data were obtained from a Vario EL III CHNOS Elemental Analyzer (Elementar Analysensysteme GmbH, Hanau, Germany). Fourier transform infrared (FT-IR) spectra were recorded on a Thermo Nicolet 380 spectrometer (Thermo Nicolet, Wisconsin, USA) by using the KBr pellet technique. Nitrogen adsorption/desorption isotherms were obtained from a TriStar II 3020 apparatus (Micromeritics Instrument Corporation, Norcross, GA, USA). Zeta potential ( $\zeta$ ) changes were acquired using a Delsa™ Nano Zeta Potential and Submicron Particle Size Analyzer (Beckman Coulter Inc., Fullerton, CA, USA).

### **Chromatographic Experiments**

The synthesized stationary phase was slurry-packed into stainless steel columns (150 mm × 4.6 mm I.D.) using MeOH/H<sub>2</sub>O (40/60, v/v) as the slurry solvent under high pressure at 70 MPa. All chromatographic experiments were performed on a 5100 series

LC system (Dalian Elite Analytical Instruments Co., Ltd., Dalian, China), which consisted of a dual pump, an online degasser, an autosampler, a column thermostat and a UV-Vis detector. A Click XIon column (5  $\mu\text{m}$ , 100  $\text{\AA}$ , 150 mm  $\times$  4.6 mm) obtained from Acchrom Technologies Co., Ltd. (Beijing, China), was utilized in the comparison experiment. The void volume of the  $\text{SiO}_2@(\text{HA-CS})_{12}$  column was determined by injecting toluene dissolved in MeOH, with ACN/H<sub>2</sub>O (99/1, v/v) as the mobile phase in isocratic mode and UV detection setting at 254 nm. The column temperature in all chromatographic experiments was set at 30 °C and the flow rate was set at 1 mL/min unless stated otherwise. All model analytes were dissolved in water or MeOH except nucleosides, which were dissolved in NaOH solution (0.1 mol/L), and the concentrations of all model analytes in solution were in the range of 0.1 - 0.5 mg/mL.

$$\frac{t_R - t_0}{t_0}$$

Retention factor  $k'$  =  $\frac{t_R - t_0}{t_0}$ , where  $t_R$  is the retention time of solutes,  $t_0$  is the dead time of the column used.

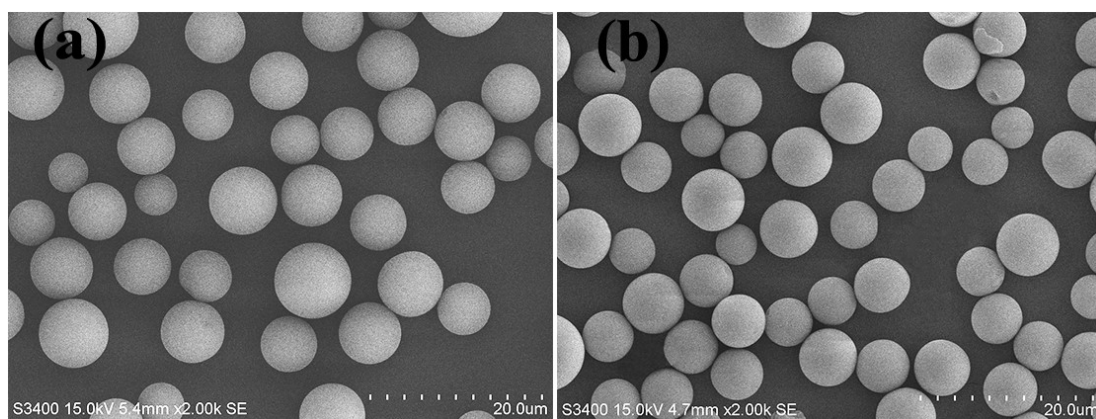

**Figure S1. SEM images of (a) SiO<sub>2</sub>@NH<sub>2</sub> and (b) SiO<sub>2</sub>@(HA-CS)<sub>12</sub>. The average diameter:  $6.01 \pm 0.86 \mu\text{m}$  for SiO<sub>2</sub>@NH<sub>2</sub> and  $5.98 \pm 0.71 \mu\text{m}$  SiO<sub>2</sub>@(HA-CS)<sub>12</sub>.**

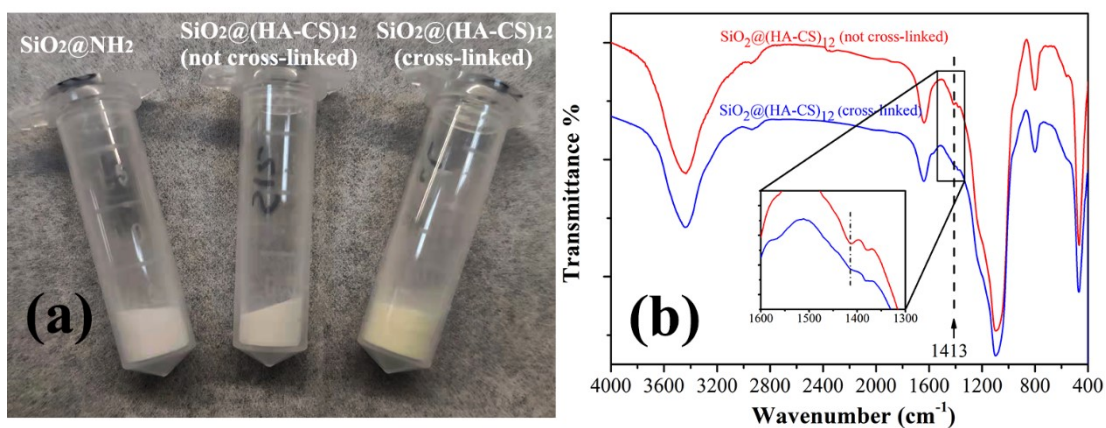

**Figure S2. (a) digital photo of SiO<sub>2</sub>@NH<sub>2</sub>, SiO<sub>2</sub>@(HA-CS)<sub>12</sub> (not cross-linked) and SiO<sub>2</sub>@(HA-CS)<sub>12</sub> (cross-linked); (b) comparison of the FT-IR spectra of SiO<sub>2</sub>@(HA-CS)<sub>12</sub> (not cross-linked) and SiO<sub>2</sub>@(HA-CS)<sub>12</sub> (cross-linked).**

**Table S1. Results of elemental analysis and special surface area.**

| Sample                                  | Elemental analysis (%) |      |      | Density of the disaccharide<br>units ( $\mu\text{mol/g}$ ) <sup>a</sup> | Special surface<br>area ( $\text{m}^2/\text{g}$ ) <sup>a</sup> | Pore size<br>(nm) <sup>b</sup> |
|-----------------------------------------|------------------------|------|------|-------------------------------------------------------------------------|----------------------------------------------------------------|--------------------------------|
|                                         | C                      | N    | H    |                                                                         |                                                                |                                |
| SiO <sub>2</sub> @NH <sub>2</sub>       | 5.45                   | 1.65 | 1.75 | 0                                                                       | 251.6                                                          | 11.7                           |
| SiO <sub>2</sub> @(HA-CS) <sub>4</sub>  | 6.96                   | 1.70 | 1.93 | 72.7                                                                    | /                                                              | /                              |
| SiO <sub>2</sub> @(HA-CS) <sub>8</sub>  | 8.40                   | 1.78 | 2.15 | 142.2                                                                   | /                                                              | /                              |
| SiO <sub>2</sub> @(HA-CS) <sub>12</sub> | 9.82                   | 1.89 | 2.39 | 210.6                                                                   | 186.3                                                          | 7.8                            |

<sup>a</sup>: The immobilized density of the disaccharide unit on SiO<sub>2</sub> surface was calculated based on the change of the carbon content. According to the zeta potential ( $\zeta$ ) results, after 12-layer deposition of polysaccharides, the surface potential of SiO<sub>2</sub>@(HA-CS)<sub>12</sub> showed little difference from SiO<sub>2</sub>@NH<sub>2</sub>. Thus, we suppose the immobilized density of HA and CS is equal. The molecular weight of the hypothetical disaccharide (formed from one HA monomer (C<sub>6</sub>H<sub>11</sub>NO<sub>4</sub>) and one CS monomer (C<sub>14</sub>H<sub>21</sub>NO<sub>11</sub>)) is 540.5, and the percentage of carbon mass to total mass is 43.89%. Then the calculation formula is:

$$\text{Density of the disaccharide unit } (\mu\text{mol/g}) = \frac{1/540.5}{\left(\frac{43.89\% - C_n}{C_n - C_0} + 1\right)} \times 10^6$$

where, C<sub>n</sub> is the carbon content of SiO<sub>2</sub>@(HA-CS)<sub>n</sub>; C<sub>0</sub> is the carbon content of SiO<sub>2</sub>NH<sub>2</sub>.

<sup>b</sup>: The results of specific surface area and average pore size were calculated from the adsorption isotherms by the BJH method;

/: untested.

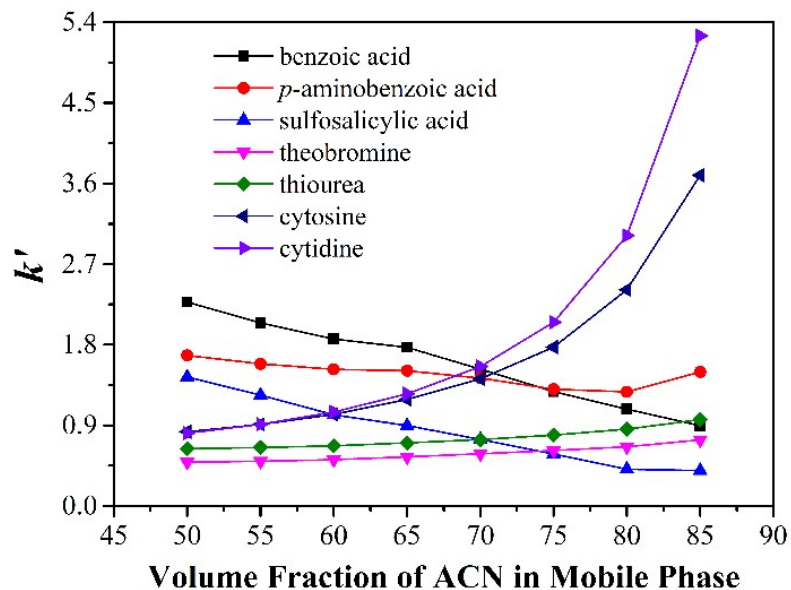

**Figure S3.** Effect of ACN volume fraction in the mobile phase on the chromatographic retention factors of basic, neutral and acidic probe molecules. Conditions: mobile phase: (A) H<sub>2</sub>O, (B) ACN; flow rate: 1 mL/min; UV detection wavelength: 254 nm.

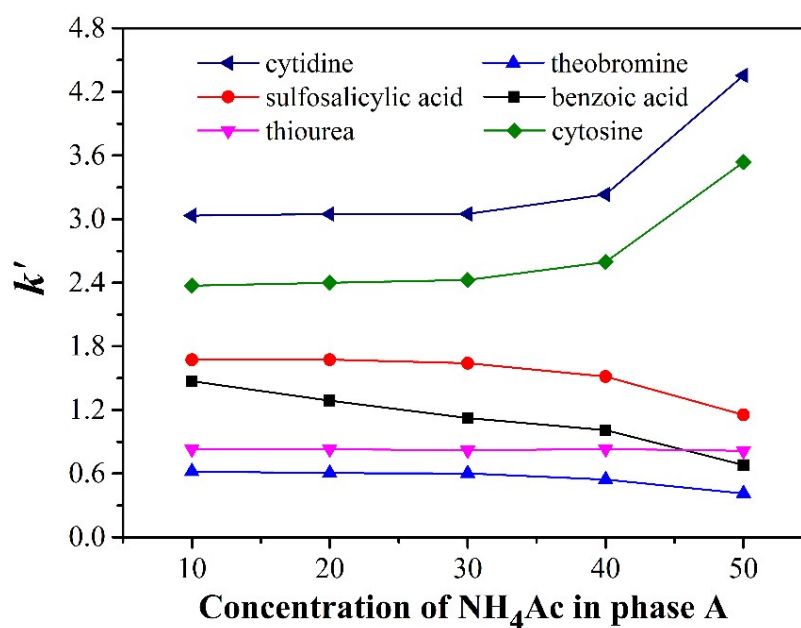

**Figure S4.** Effect of buffer concentration in the water phase on the chromatographic retention factors of basic, neutral and acidic probe analytes. Conditions: mobile phase: (A) NH<sub>4</sub>Ac buffer solution (pH = 6.82), (B) ACN; flow rate: 1 mL/min; column temperature: 30 °C; UV detection wavelength: 254 nm.



**The kinetic equation of the retention time versus the concentration of H<sup>+</sup> in the mobile phase.**

The equation was derived as follows:

First, taking an acidic solute (HA) as the sample, the equilibrium expression for the dissociation ( $\text{AH} \xrightleftharpoons{K_a} \text{A}^- + \text{H}^+$ ) can be written as:

$$K_a = \frac{[\text{A}^-][\text{H}^+]}{[\text{AH}]} \quad (1)$$

$$[\text{AH}]_{\text{total}} = [\text{AH}] + [\text{A}^-] \quad (2)$$

where  $K_a$  is the dissociation equilibrium constant of HA. From Eq. (1, 2),

$$\alpha_{\text{AH}} = [\text{AH}]/[\text{AH}]_{\text{total}} = \frac{[\text{H}^+]}{K_a + [\text{H}^+]} \quad (3)$$

$$\alpha_{\text{A}^-} = [\text{A}^-]/[\text{AH}]_{\text{total}} = \frac{K_a}{K_a + [\text{H}^+]} \quad (4)$$

where  $\alpha_{\text{AH}}$  and  $\alpha_{\text{A}^-}$  are the molar fractions of the AH molecule and A<sup>-</sup> anion, respectively. Because there is a transition equilibrium between the ionic form (A<sup>-</sup>) and molecular form (HA), we suppose that the linear velocity of the acidic solute in the column is proportional to the molar fraction of the two forms.

$$u_{\text{acid}} = \alpha_{\text{AH}} \cdot u_{\text{AH}} + \alpha_{\text{A}^-} \cdot u_{\text{A}^-} \quad (5)$$

where  $u$  is the linear velocity.

$$u_{\text{AH}} = L/t_{\text{AH}} \quad (6)$$

$$u_{\text{A}^-} = L/t_{\text{A}^-} \quad (7)$$

where  $L$  is the column length, and  $t$  is the retention time. From Eq. (3 - 7),

$$t_{\text{acid}} = L/u_{\text{acid}} = \frac{K_a + [\text{H}^+]}{[\text{H}^+]/t_{\text{AH}} + K_a/t_{\text{A}^-}} \quad (8)$$

In a similar way, for basic solutes ( $\text{B} + \text{H}_2\text{O} \xrightleftharpoons{K_b} \text{BH}^+ + \text{OH}^-$ ), the retention time equation is:

$$t_{\text{base}} = L/u_{\text{base}} = \frac{K_b + [\text{OH}^-]}{[\text{OH}^-]/t_{\text{B}} + K_b/t_{\text{BH}^+}} \quad (9)$$

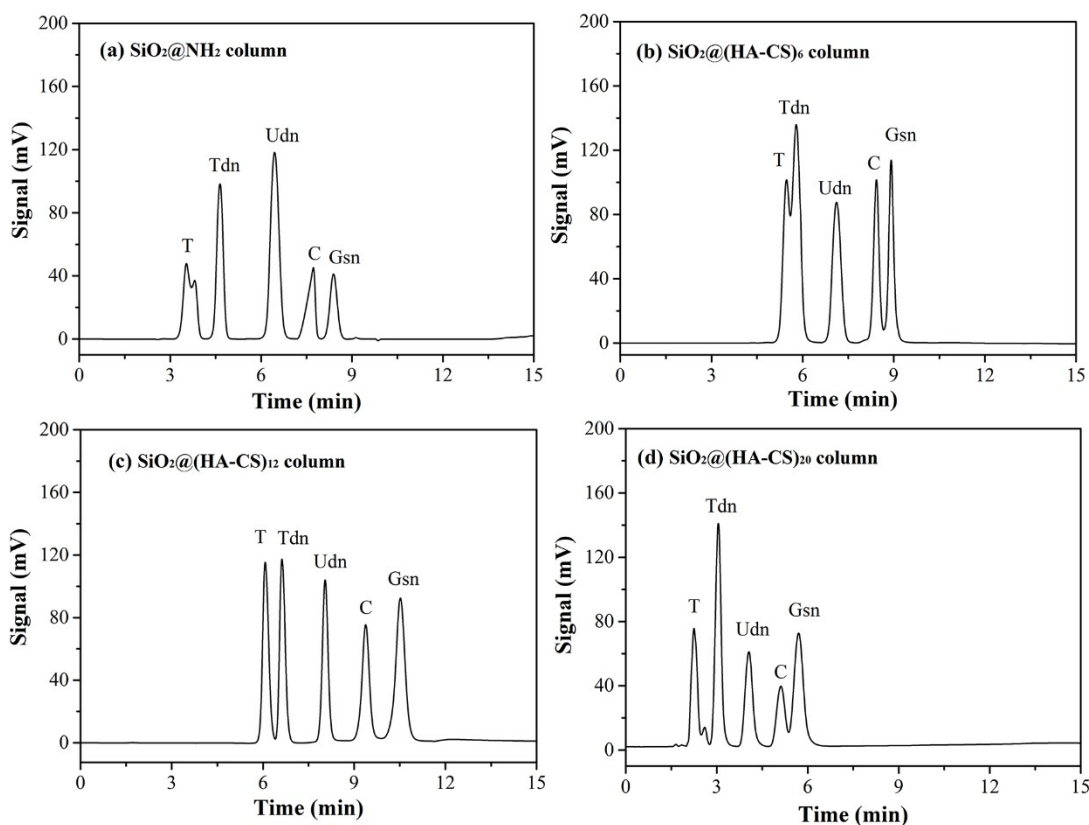

**Figure S5. Comparison of chromatographic separation performance for nucleoside and bases on  $\text{SiO}_2@\text{NH}_2$  column,  $\text{SiO}_2@(\text{HA-CS})_6$  column,  $\text{SiO}_2@(\text{HA-CS})_{12}$  column and  $\text{SiO}_2@(\text{HA-CS})_{20}$  column. Conditions: (a): mobile phase (A): 50 mmol/L  $\text{NH}_4\text{Ac}$  in water, (B) ACN; isocratic: 0 - 10 min, 10 - 25% A; flow rate: 1 mL/min; UV detector wavelength: 254 nm; (b, c and d): mobile phase (A) 15 mmol/L  $\text{NH}_4\text{Ac}$  in water (pH 4.92), (B) ACN; gradient: 0 - 5 min, 5% A, 5 - 10 min, 5% - 30% A, 10 - 20 min, 30% A; UV detection wavelength: 254 nm.**

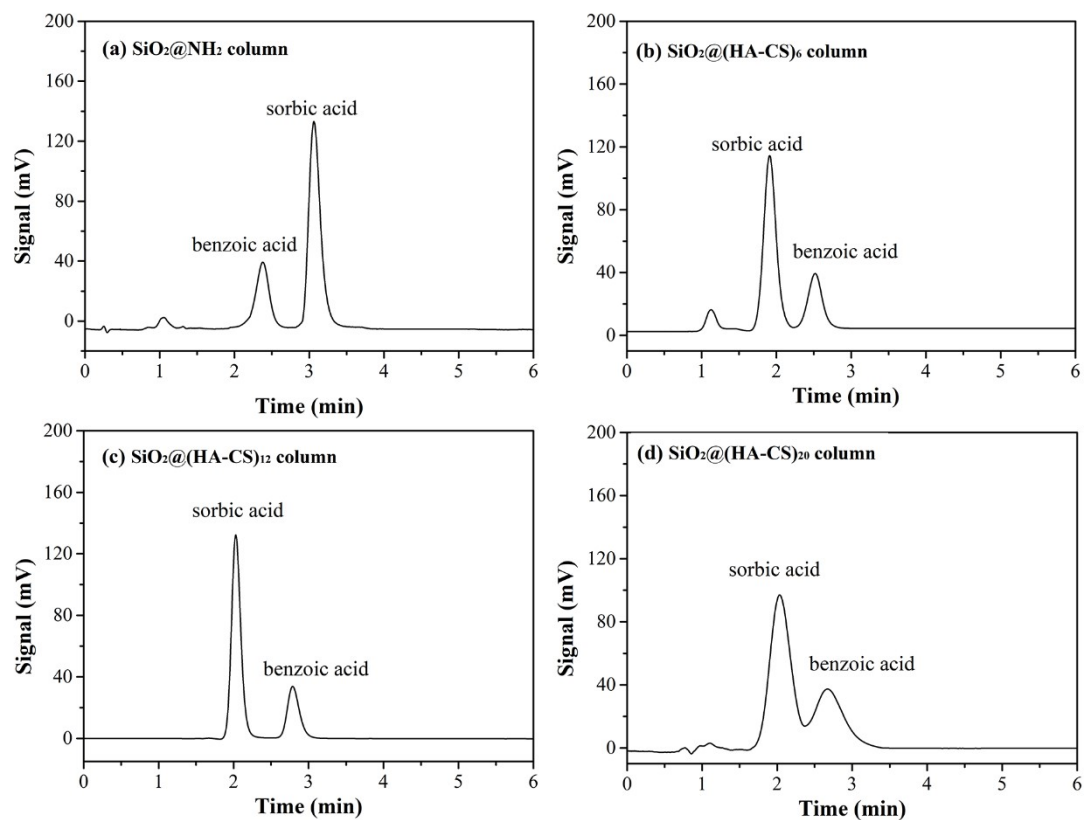

**Figure S6. Comparison of separation performance for acidic solutes on  $\text{SiO}_2@(\text{NH}_2)$  column,  $\text{SiO}_2@(\text{HA-CS})_6$  column,  $\text{SiO}_2@(\text{HA-CS})_{12}$  column and  $\text{SiO}_2@(\text{HA-CS})_{20}$  column. Conditions: (a): mobile phase (A): 50 mmol/L  $\text{KH}_2\text{PO}_4$  in water (pH 2.5, titrated with  $\text{H}_3\text{PO}_4$ ), (B) ACN; isocratic: 35% A; flow rate: 1 mL/min; UV detector wavelength: 254 nm; (b, c and d): mobile phase (A) 1 mmol/L  $\text{KH}_2\text{PO}_4$  in water, (B) ACN; isocratic 70%A; UV detection wavelength: 254 nm.**

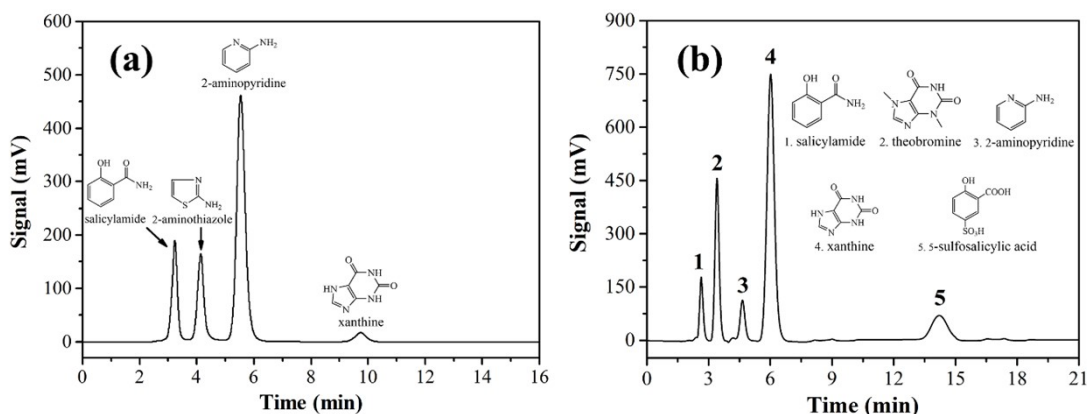

**Figure S7.** The chromatographic separation of several organic bases and organic acids on  $\text{SiO}_2@(\text{HA-CS})_{12}$  column, conditions: (a): mobile phase (A): 5 mmol/L  $\text{KH}_2\text{PO}_4$  in water, (B) ACN; isocratic: 35% A; flow rate: 1 mL/min; UV detector wavelength: 254 nm; (b): mobile phase (A): 25 mmol/L  $\text{KH}_2\text{PO}_4$  in water (pH = 3.4), (B) ACN; isocratic: 30% A; flow rate: 1 mL/min; UV detector wavelength: 254 nm.

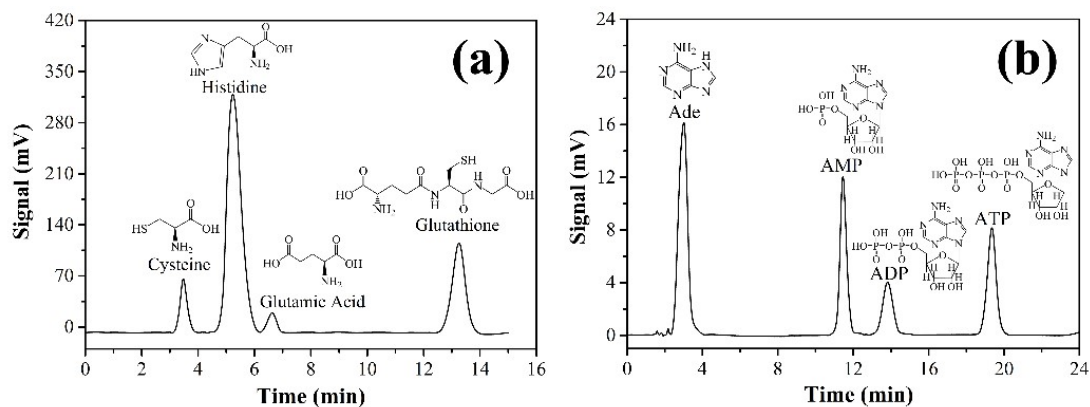

**Figure S8.** The chromatographic separation of (a) amino acids, small peptide and (b) adenosine phosphate derivatives on  $\text{SiO}_2@(\text{HA-CS})_{12}$  column, conditions: (a) mobile phase (A) 0.3%  $\text{H}_3\text{PO}_4$  in water, (B) ACN, isocratic: 5%A, detector wavelength: 210 nm; (b) mobile phase: (A) 0.2%  $\text{H}_3\text{PO}_4$  in water, (B) ACN; gradient: 0 - 10 min, 35% - 70% A; detector wavelength: 254 nm.

**Table S2. The  $pK_a$  values of organic acids solutes.**

| organic acids               | $pK_{a1}$ | $pK_{a2}$ | $pK_{a3}$ |
|-----------------------------|-----------|-----------|-----------|
| sorbic acid                 | 4.76      | /         | /         |
| benzoic acid                | 4.17      | /         | /         |
| <i>m</i> -phthalic acid     | 3.62      | 4.60      | /         |
| <i>p</i> -phthalic acid     | 3.54      | 4.46      | /         |
| trimesic acid               | 2.12      | 4.10      | 5.18      |
| sulfosalicylic acid         | -0.62     | 3.18      | 11.74     |
| theobromine                 | 11.0      | /         | /         |
| cytosine                    | 4.60      | /         | /         |
| cytidine                    | 4.22      | /         | /         |
| thiourea                    | 21.0      | /         | /         |
| <i>p</i> -aminobenzoic acid | 2.38      | 4.89      | /         |

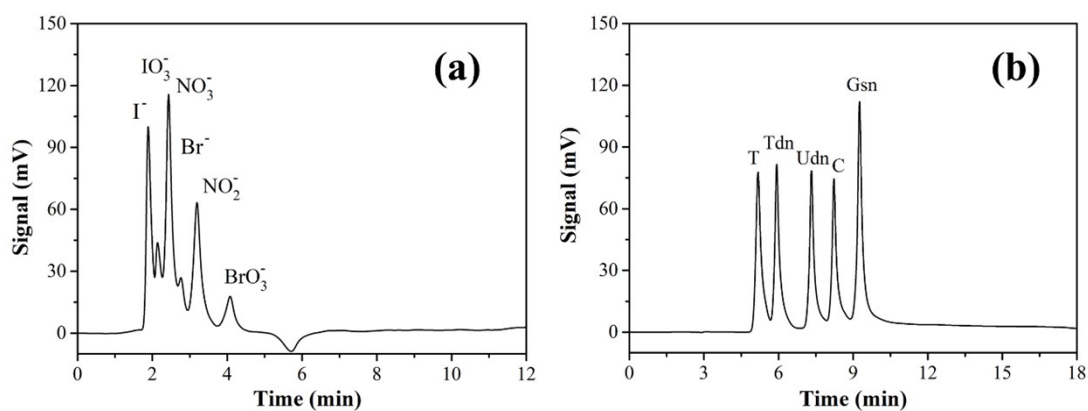

**Figure S9. Comparison separation of (a) inorganic anions and (b) nucleoside and bases on Click XIon column, conditions: (a): mobile phase (A) 50 mmol/L  $\text{NH}_4\text{Ac}$  in water (pH 4.88), (B) ACN; isocratic 20% A; UV detection wavelength: 210 nm; (b): mobile phase (A) 15 mmol/L  $\text{NH}_4\text{Ac}$  in water (pH 4.92), (B) ACN; gradient: 0 - 5 min, 5% A, 5 - 10 min, 5% - 30% A, 10 - 20 min, 30% A; UV detection wavelength: 254 nm.**

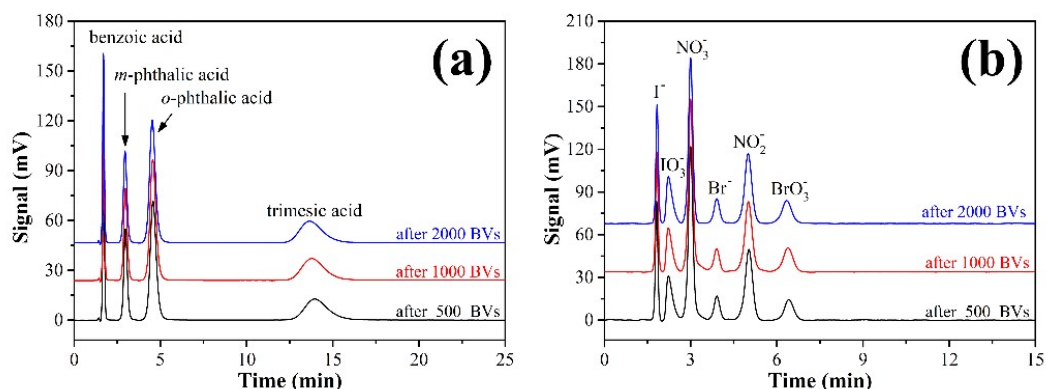

**Figure S10.** The stability test of the synthesized  $\text{SiO}_2@(\text{HA-CS})_{12}$  (cross-linked) stationary phase, conditions: (a): mobile phase (A) 15 mmol/L  $\text{KH}_2\text{PO}_4$  in water (pH 3.25), (B) ACN; isocratic 60% A; UV detection wavelength: 254 nm; (b): mobile phase (A) 50 mmol/L  $\text{NH}_4\text{Ac}$  in water (pH 4.88), (B) ACN; isocratic 20% A; UV detection wavelength: 210 nm. The Y axis was shifted for better display.

**Table S3.** The retention time of the solutes and RSDs on the  $\text{SiO}_2@(\text{HA-CS})_{12}$  (cross-linked) column in the stability test.

| Solute                  | Retention time |         |          | RSD (%) |
|-------------------------|----------------|---------|----------|---------|
|                         | 500 BVs        | 1000BVs | 2000 BVs |         |
| benzoic acid            | 1.69           | 1.71    | 1.69     | 0.545   |
| <i>m</i> -phthalic acid | 2.95           | 2.96    | 2.96     | 0.215   |
| <i>o</i> -phthalic acid | 4.53           | 4.55    | 4.56     | 0.352   |
| trimesic acid           | 13.67          | 13.77   | 13.90    | 0.859   |
| $\text{I}^-$            | 1.83           | 1.82    | 1.81     | 0.374   |
| $\text{IO}_3^-$         | 2.22           | 2.23    | 2.23     | 0.158   |
| $\text{NO}_3^-$         | 3.00           | 3.00    | 3.00     | 0.133   |
| $\text{Br}^-$           | 3.91           | 3.90    | 3.91     | 0.174   |
| $\text{NO}_2^-$         | 5.00           | 5.01    | 5.03     | 0.290   |
| $\text{BrO}_3^-$        | 6.34           | 6.39    | 6.41     | 0.563   |





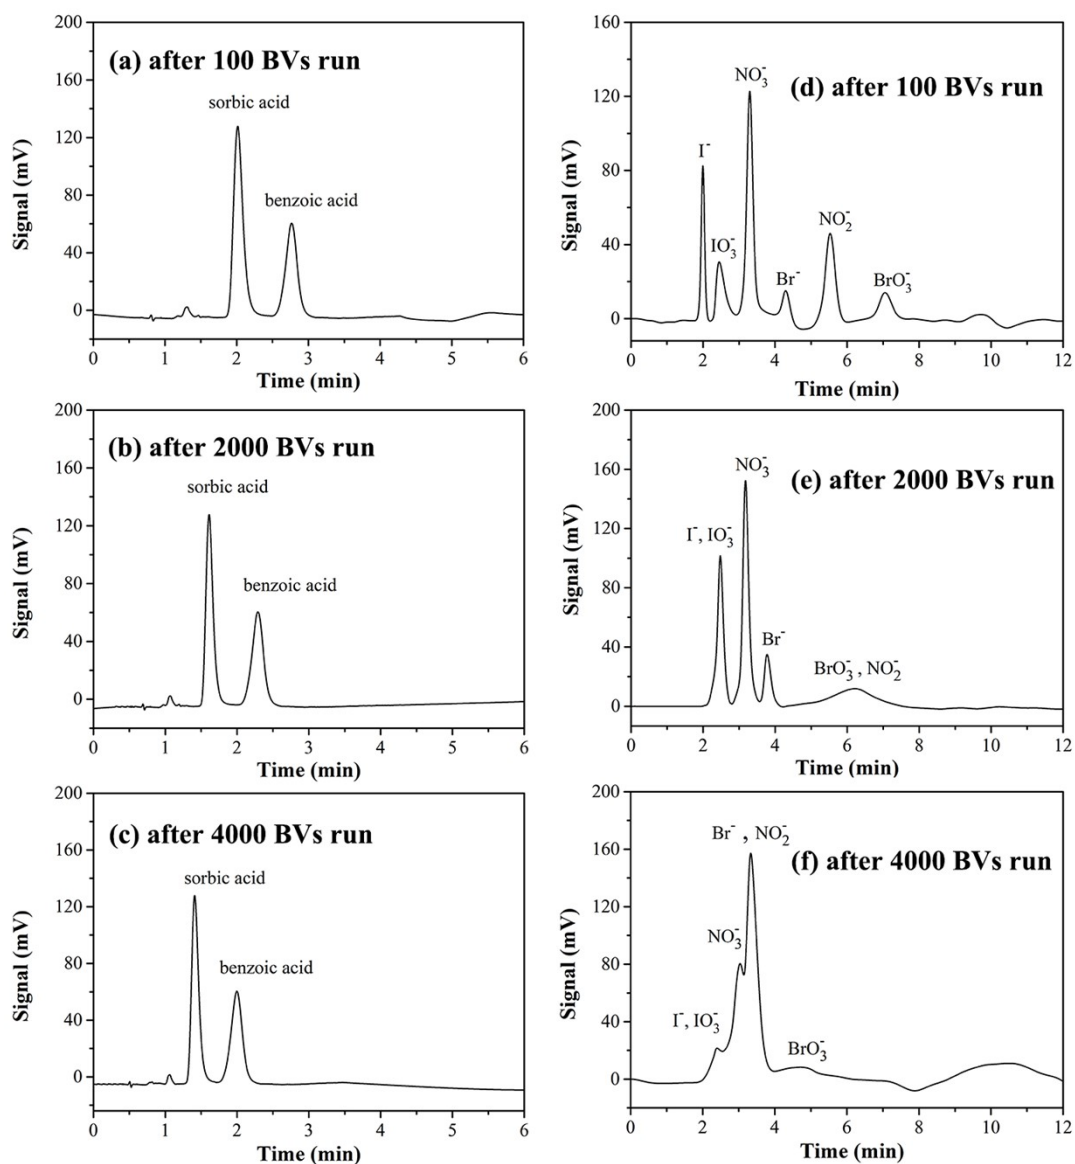

**Figure S11. The stability test of the uncross-linked  $\text{SiO}_2@(\text{HA-CS})_{12}$  stationary phase. Conditions: (a, b and c): mobile phase (A) 1 mmol/L  $\text{KH}_2\text{PO}_4$  in water, (B) ACN; isocratic 70%A; UV detection wavelength: 254 nm; (d, e and f): mobile phase (A) 50 mmol/L  $\text{NH}_4\text{Ac}$  in water (pH 4.88, titrated with acetic acid), (B) ACN; isocratic 20% A; UV detection wavelength: 210 nm.**

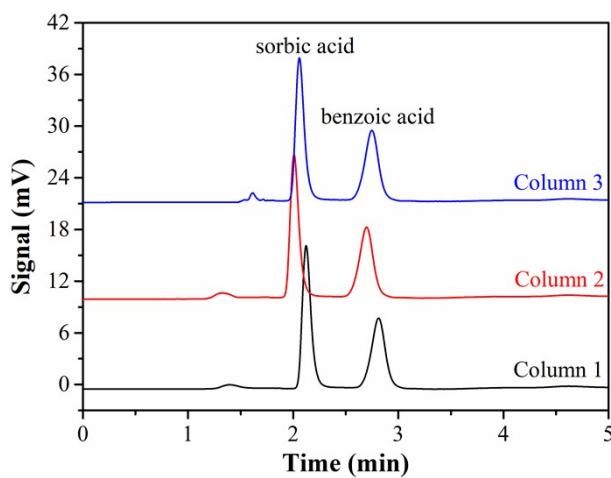

**Figure S12. Lot-to-lot repeatability of the synthesis procedure. Chromatographic conditions: mobile phase (A) 1 mmol/L  $\text{KH}_2\text{PO}_4$  in water, (B) ACN; isocratic 70%A; UV detection wavelength: 254 nm. The Y axis was shifted for better display.**

**Table S4. Results of lot-to-lot repeatability of the synthesis procedure.**

|         | Retention time (min) |              | Resolution |
|---------|----------------------|--------------|------------|
|         | sorbic acid          | benzoic acid |            |
| Batch 1 | 2.06                 | 2.75         | 2.37       |
| Batch 2 | 2.02                 | 2.70         | 2.40       |
| Batch 3 | 2.12                 | 2.81         | 2.28       |
| RSD     | 2.44%                | 2.00%        | 2.64%      |
